# Supplementary material for: The Olive Oil‐Based Lipid Clinoleic Blocks Leukocyte Recruitment and Improves Survival during Systemic Inflammation: A Comparative In Vivo Study of Different Parenteral Lipid Emulsions
Source: Hindawi journal article supplement (doi:10.1155/2015/757059), 2015-01-01

## SUPPLEMENTAL MATERIAL

**Supplemental Table 1. Murine blood serum levels of lipids and liver enzymes after lipid treatment.** Triglycerides, cholesterol, glutamic oxaloacetic transaminase (GOT) and glutamic pyruvic transaminase (GPT) are displayed 3h after intravenous administration of 1 g/kg of different lipid emulsions or normal saline. Data are presented as mean  $\pm$  SEM; n.s. = not significant.

|            | <u>Mice</u> | <u>Triglycerides</u> | <u>Cholesterol</u> | <u>GOT</u>   | <u>GPT</u>   |
|------------|-------------|----------------------|--------------------|--------------|--------------|
|            | N           | (mg/dl)              | (mg/dl)            | (U/l)        | (U/l)        |
| Control    | 6           | 50 $\pm$ 10          | 100 $\pm$ 10       | 230 $\pm$ 40 | 100 $\pm$ 30 |
| Clinoleic  | 9           | 130 $\pm$ 20*        | 90 $\pm$ 10        | 190 $\pm$ 30 | 80 $\pm$ 10  |
| Smoflipid  | 9           | 90 $\pm$ 10*         | 80 $\pm$ 10        | 190 $\pm$ 30 | 75 $\pm$ 10  |
| Lipofundin | 7           | 90 $\pm$ 10*         | 90 $\pm$ 10        | 250 $\pm$ 30 | 110 $\pm$ 15 |
|            |             | * vs. control        | n.s.               | n.s.         | n.s.         |

**Supplemental Table 2. Hemodynamic and microvascular parameters of cremaster muscle venules after lipid treatment during trauma-induced inflammation.** Vessel diameter, centerline velocity, and wall shear rate are displayed after intravenous administration of 1g/kg of different lipid emulsions or normal saline. Data are presented as mean  $\pm$  SEM; n.s. = not significant.

|            | <u>Mice</u> | <u>Venules</u> | <u>Diameter</u>   | <u>Centerline Velocity</u> | <u>Wall Shear Rate</u> | <u>Systemic Leukocyte Counts</u> |
|------------|-------------|----------------|-------------------|----------------------------|------------------------|----------------------------------|
|            | N           | n              | ( $\mu\text{m}$ ) | ( $\mu\text{m/s}$ )        | ( $\text{s}^{-1}$ )    | (/ $\mu\text{l}$ )               |
| Control    | 4           | 18             | 28 $\pm$ 1        | 2200 $\pm$ 100             | 1900 $\pm$ 100         | 6300 $\pm$ 100                   |
| Smoflipid  | 4           | 12             | 28 $\pm$ 1        | 2200 $\pm$ 50              | 2200 $\pm$ 150         | 5100 $\pm$ 600                   |
| Clinoleic  | 4           | 18             | 28 $\pm$ 1        | 2200 $\pm$ 50              | 2000 $\pm$ 100         | 7300 $\pm$ 600                   |
| Lipofundin | 3           | 29             | 27 $\pm$ 1        | 2100 $\pm$ 50              | 2000 $\pm$ 100         | 4900 $\pm$ 500                   |
|            |             |                | n.s.              | n.s.                       | n.s.                   | n.s.                             |

**Supplemental Table 3. Hemodynamic and microvascular parameters of cremaster muscle venules after lipid treatment during LPS-induced inflammation.** Vessel diameter, centerline velocity, and wall shear rate are displayed after intravenous administration of 1g/kg of different lipid emulsions or normal saline. Data are presented as mean  $\pm$  SEM; n.s. = not significant.

|            | <u>Mice</u> | <u>Venules</u> | <u>Diameter</u>   | <u>Centerline Velocity</u> | <u>Wall Shear Rate</u> | <u>Systemic Leukocyte Counts</u> |
|------------|-------------|----------------|-------------------|----------------------------|------------------------|----------------------------------|
|            | N           | n              | ( $\mu\text{m}$ ) | ( $\mu\text{m/s}$ )        | ( $\text{s}^{-1}$ )    | (/ $\mu\text{l}$ )               |
| Control    | 3           | 21             | 27 $\pm$ 1        | 2100 $\pm$ 50              | 1900 $\pm$ 100         | 3700 $\pm$ 100                   |
| Clinoleic  | 3           | 34             | 26 $\pm$ 1        | 2100 $\pm$ 50              | 2100 $\pm$ 100         | 4400 $\pm$ 200                   |
| Smoflipid  | 3           | 34             | 27 $\pm$ 1        | 2100 $\pm$ 50              | 1900 $\pm$ 100         | 6200 $\pm$ 500                   |
| Lipofundin | 3           | 29             | 26 $\pm$ 1        | 2100 $\pm$ 50              | 2000 $\pm$ 100         | 6500 $\pm$ 200                   |
|            |             |                | n.s.              | n.s.                       | n.s.                   | n.s.                             |

**Supplemental Figure 1. Effect of different lipid compositions on neutrophil infiltration into LPS-stimulated cremaster muscles.** Neutrophil infiltration (number of transmigrated neutrophils per mm<sup>2</sup> of perivascular surface area) in Giemsa-stained cremaster muscle whole mounts of mice treated with Clinoleic, Lipofundin, Smoflipid (1g/kg) or saline (control) was investigated after intravital microscopy in the LPS model. All values are presented as mean  $\pm$  SEM from three or more mice per group. Significant differences ( $p < 0.05$ ) to saline treated mice are indicated by the asterisk.

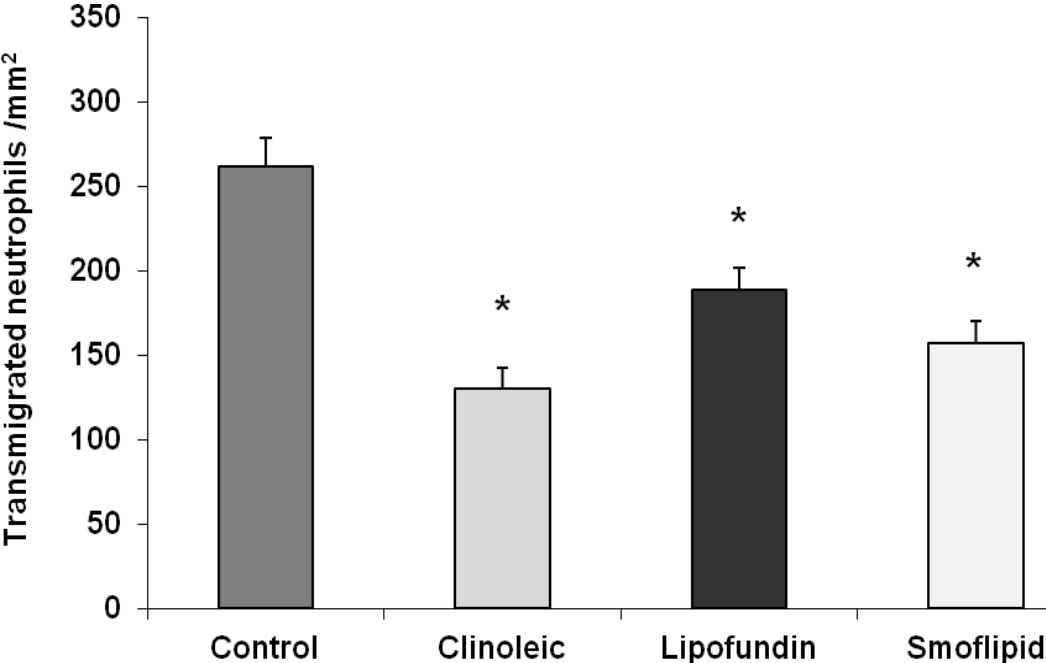

Supplement: f1 [file 757059.f1.pdf]
